# Supplementary material for: Gestational Diabetes and Preeclampsia in Association with Air Pollution at Levels below Current Air Quality Guidelines
Source: PubMed Central journal article supplement (PMC3620758; doi:10.1289/ehp.1205736), 2013-01-16
Supplement: ehp.1205736.s001.pdf [file ehp.1205736.s001.pdf]

**Supplemental Material**  
**Gestational Diabetes and Preeclampsia in Association with Air Pollution**  
**at Levels below Current Air Quality Guidelines**

Ebba Malmqvist, Kristina Jakobsson, Håkan Tinnerberg, Anna Rignell-Hydbom, Lars  
Rylander

Division of Occupational and Environmental Medicine, Lund University, Lund, Sweden

**Table of Contents**

|                                                                                                                                                                            |   |
|----------------------------------------------------------------------------------------------------------------------------------------------------------------------------|---|
| Table S1. Background information of analyses of NO <sub>x</sub> exposure during third trimester.....                                                                       | 2 |
| Table S2. Odds ratio for gestational diabetes in relation to NO <sub>x</sub> (in quartiles) and traffic density (measured as vehicles/min) .....                           | 3 |
| Table S3: Odds ratio for gestational diabetes outcome during 1 <sup>st</sup> trimester in relation to NO <sub>x</sub> exposure.....                                        | 3 |
| Table S4. ORs of outcomes in Nordic-born women, in relation to urban/non-urban contrasts, and contrasts within urban and non-urban areas.....                              | 4 |
| Table S5. ORs and 95% CI for Nordic born women obtained from multivariate logistic regression looking at actual exposure and known risk factors. ....                      | 5 |
| Table S6. Odds ratio of preeclampsia in relation to NO <sub>x</sub> (in quartiles and measured in µg/m <sup>3</sup> ) and traffic density (measured as vehicles/min) ..... | 6 |
| Table S7: Odds ratio for preeclampsia outcome during 1 <sup>st</sup> trimester and 2 <sup>nd</sup> trimester in relation to NO <sub>x</sub> exposure .....                 | 7 |

**Table S1. Background information of analyses of NO<sub>x</sub> exposure during third trimester**

| Potential confounders       | 1 <sup>st</sup> quartile of NO <sub>x</sub><br>2.5-8.9 µg/m <sup>3</sup><br>N (%) | 2 <sup>nd</sup> quartile of NO <sub>x</sub><br>9.0-14.1 µg/m <sup>3</sup><br>N (%) | 3 <sup>rd</sup> quartile of NO <sub>x</sub> 14.2-22.6 µg/m <sup>3</sup><br>N (%) | 4 <sup>th</sup> quartile of NO <sub>x</sub> >22.7 µg/m <sup>3</sup><br>N (%) |
|-----------------------------|-----------------------------------------------------------------------------------|------------------------------------------------------------------------------------|----------------------------------------------------------------------------------|------------------------------------------------------------------------------|
| <b>Maternal Age</b>         |                                                                                   |                                                                                    |                                                                                  |                                                                              |
| <25                         | 2786 (13.5)                                                                       | 2377 (12.1)                                                                        | 2537 (13.2)                                                                      | 2929 (17.2)                                                                  |
| 25-30                       | 7033 (34.2)                                                                       | 6368 (32.3)                                                                        | 5719 (29.7)                                                                      | 5627 (33.1)                                                                  |
| 30-35                       | 7084 (34.4)                                                                       | 7322 (37.1)                                                                        | 7104 (36.9)                                                                      | 5519 (32.5)                                                                  |
| ≥35                         | 3677 (17.9)                                                                       | 3659 (18.5)                                                                        | 3879 (20.2)                                                                      | 2905 (17.1)                                                                  |
| <b>Country of Origin</b>    |                                                                                   |                                                                                    |                                                                                  |                                                                              |
| Sweden                      | 18395 (90.9)                                                                      | 16608 (85.6)                                                                       | 14013 (74.2)                                                                     | 10593 (63.4)                                                                 |
| Other Nordic                | 332 (1.6)                                                                         | 336 (1.7)                                                                          | 331 (1.8)                                                                        | 301 (1.8)                                                                    |
| Other Western               | 192 (0.9)                                                                         | 259 (1.3)                                                                          | 313 (1.7)                                                                        | 232 (1.4)                                                                    |
| Eastern Europe              | 643 (3.2)                                                                         | 966 (5.0)                                                                          | 1603 (8.5)                                                                       | 1823 (10.9)                                                                  |
| Africa Sub Sahara           | 93 (0.5)                                                                          | 98 (0.5)                                                                           | 241 (1.3)                                                                        | 375 (2.2)                                                                    |
| Middle East/North Africa    | 220 (1.1)                                                                         | 568 (2.9)                                                                          | 1760 (9.3)                                                                       | 2615 (15.6)                                                                  |
| Asia                        | 262 (1.3)                                                                         | 433 (2.2)                                                                          | 425 (2.3)                                                                        | 529 (3.2)                                                                    |
| South/Central America       | 97 (0.5)                                                                          | 128 (0.7)                                                                          | 201 (1.1)                                                                        | 252 (1.5)                                                                    |
| <b>Parity</b>               |                                                                                   |                                                                                    |                                                                                  |                                                                              |
| 1                           | 8216 (40.2)                                                                       | 8749 (44.6)                                                                        | 9478 (49.4)                                                                      | 9289 (54.8)                                                                  |
| 2                           | 7563 (37.0)                                                                       | 7241 (36.9)                                                                        | 6276 (32.7)                                                                      | 4566 (26.9)                                                                  |
| ≥3                          | 4649 (22.8)                                                                       | 3636 (18.5)                                                                        | 3414 (17.8)                                                                      | 3104 (18.3)                                                                  |
| <b>BMI</b>                  |                                                                                   |                                                                                    |                                                                                  |                                                                              |
| <18.5                       | 532 (2.6)                                                                         | 739 (3.7)                                                                          | 750 (3.9)                                                                        | 711 (4.2)                                                                    |
| 18.5-24.9                   | 7362 (35.8)                                                                       | 7699 (39.0)                                                                        | 7868 (40.9)                                                                      | 6982 (41.1)                                                                  |
| 25-29.9                     | 5041 (24.5)                                                                       | 4288 (21.7)                                                                        | 4062 (21.1)                                                                      | 3534 (20.8)                                                                  |
| ≥30                         | 2591 (12.6)                                                                       | 1845 (9.4)                                                                         | 1581 (8.2)                                                                       | 1462 (8.6)                                                                   |
| Missing                     | 5054 (24.6)                                                                       | 5155 (26.1)                                                                        | 4978 (25.9)                                                                      | 4291 (25.3)                                                                  |
| <b>Smoking (cig/day)</b>    |                                                                                   |                                                                                    |                                                                                  |                                                                              |
| 0                           | 16643 (80.9)                                                                      | 16242 (82.3)                                                                       | 15858 (82.4)                                                                     | 13765 (81.1)                                                                 |
| 1-9                         | 1739 (8.4)                                                                        | 1537 (7.8)                                                                         | 1432 (7.4)                                                                       | 1413 (8.3)                                                                   |
| >10                         | 837 (4.1)                                                                         | 646 (3.3)                                                                          | 592 (3.1)                                                                        | 716 (4.2)                                                                    |
| Missing                     | 1361 (6.6)                                                                        | 1301 (6.6)                                                                         | 1357 (7.1)                                                                       | 1086 (6.4)                                                                   |
| <b>Diabetes type 1</b>      | 93 (0.5)                                                                          | 105 (0.5)                                                                          | 95 (0.5)                                                                         | 94 (0.6)                                                                     |
| <b>Chronic hypertension</b> | 64 (0.3)                                                                          | 81 (0.4)                                                                           | 93 (0.5)                                                                         | 86 (0.5)                                                                     |
| <b>Changed residency</b>    | 2339 (11.4)                                                                       | 2597 (13.2)                                                                        | 2469 (12.8)                                                                      | 1734 (10.2)                                                                  |
| <b>Birth Year</b>           |                                                                                   |                                                                                    |                                                                                  |                                                                              |
| 1999                        | 2255 (11.0)                                                                       | 2517 (12.8)                                                                        | 2310 (12.0)                                                                      | 3227 (19.0)                                                                  |
| 2000                        | 2481 (12.1)                                                                       | 2618 (13.3)                                                                        | 2589 (13.5)                                                                      | 2861 (16.8)                                                                  |
| 2001                        | 2529 (12.3)                                                                       | 2711 (13.7)                                                                        | 2586 (13.4)                                                                      | 2991 (17.6)                                                                  |
| 2002                        | 3195 (15.5)                                                                       | 2903 (14.7)                                                                        | 3001 (15.6)                                                                      | 2347 (13.8)                                                                  |
| 2003                        | 3033 (14.7)                                                                       | 2958 (15.0)                                                                        | 2699 (14.0)                                                                      | 2469 (14.5)                                                                  |
| 2004                        | 3285 (16.0)                                                                       | 2936 (14.9)                                                                        | 3016 (15.7)                                                                      | 1836 (10.8)                                                                  |
| 2005                        | 3802 (18.5)                                                                       | 3083 (15.6)                                                                        | 3038 (15.8)                                                                      | 1249 (7.4)                                                                   |
| <b>Gestational diabetes</b> | 282 (1.4)                                                                         | 341 (1.7)                                                                          | 448 (2.3)                                                                        | 464 (2.7)                                                                    |

**Table S2. Odds ratio for gestational diabetes in relation to NO<sub>x</sub> (in quartiles) and traffic density (measured as vehicles/min)**

| <b>Gestational diabetes</b>                        | <b>Adjusted Non movers<br/>OR (95% CI)</b> | <b>Adjusted Nordic born<br/>OR (95% CI)</b> | <b>Adjusted Primiparae<br/>OR (95% CI)</b> |
|----------------------------------------------------|--------------------------------------------|---------------------------------------------|--------------------------------------------|
| <b>NO<sub>x</sub>-quartiles (µg/m<sup>3</sup>)</b> |                                            |                                             |                                            |
| Q1=2.5-8.9                                         | 1.00 (ref)                                 | 1.00 (ref)                                  | 1.00 (ref)                                 |
| Q2=9.0-14.1                                        | 1.24 (1.02, 1.51)                          | 1.33 (1.09, 1.63)                           | 1.34 (1.00, 1.81)                          |
| Q3=14.2-22.6                                       | 1.66 (1.38, 2.00)                          | 1.57 (1.28, 1.93)                           | 1.66 (1.25, 2.20)                          |
| Q4=>22.7                                           | 1.80 (1.49, 2.19)                          | 1.56 (1.24, 1.95)                           | 1.53 (1.14, 2.05)                          |
| <b>Traffic density within 200m</b>                 |                                            |                                             |                                            |
| no road                                            | 1.00 (ref)                                 | 1.00 (ref)                                  | 1.00 (ref)                                 |
| <2                                                 | 0.89 (0.73, 1.07)                          | 0.83 (0.68, 1.01)                           | 0.81 (0.60, 1.08)                          |
| 2-5                                                | 0.92 (0.77, 1.11)                          | 0.95 (0.77, 1.16)                           | 0.92 (0.70, 1.21)                          |
| 5-10                                               | 1.22 (0.99, 1.49)                          | 1.01 (0.77, 1.31)                           | 0.97 (0.71, 1.32)                          |
| >10                                                | 1.29 (1.05, 1.60)                          | 1.17 (0.90, 1.53)                           | 0.91 (0.67, 1.25)                          |

Gestational diabetes model adjusting for parity, BMI, maternal age, calendar year and country of origin and exposure for second trimester.

**Table S3: Odds ratio for gestational diabetes outcome during 1<sup>st</sup> trimester in relation to NO<sub>x</sub> exposure**

| <b>NO<sub>x</sub> (µg/m<sup>3</sup>)</b> | <b>Gestational diabetes</b> |               |                  |               |
|------------------------------------------|-----------------------------|---------------|------------------|---------------|
|                                          | <b>Crude</b>                |               | <b>Adjusted*</b> |               |
|                                          | <b>OR</b>                   | <b>95% CI</b> | <b>OR</b>        | <b>95% CI</b> |
| <b>2.5-8.9</b>                           | 1.00                        | (Ref)         | 1.00             | (Ref)         |
| <b>9.0-14.1</b>                          | 1.32                        | 1.10 – 1.59   | 1.27             | 1.05 – 1.53   |
| <b>14.2-22.6</b>                         | 1.73                        | 1.45 – 2.05   | 1.48             | 1.23 – 1.77   |
| <b>&gt;22.7</b>                          | 2.05                        | 1.73 – 2.42   | 1.65             | 1.38 – 1.99   |

\*Model adjusting for parity BMI, maternal age, calendar year and country of origin

**Table S4. ORs of outcomes in Nordic-born women, in relation to urban/non-urban contrasts, and contrasts within urban and non-urban areas**

| <b>Exposure</b>                                  | <b>Gestational Diabetes Adjusted OR (95% CI)</b> | <b>Preeclampsia Adjusted OR (95% CI)</b> | <b>Preeclampsia mild Adjusted OR (95% CI)</b> | <b>Preeclampsia severe Adjusted OR (95% CI)</b> |
|--------------------------------------------------|--------------------------------------------------|------------------------------------------|-----------------------------------------------|-------------------------------------------------|
| <b>Urban/non-urban</b>                           |                                                  |                                          |                                               |                                                 |
| Outside Malmö/Helsingborg                        | 1.00 (ref)                                       | 1.00 (ref)                               | 1.00 (ref)                                    | 1.00 (ref)                                      |
| Within Malmö/Helsingborg                         | 1.20<br>(0.99, 1.46)                             | 1.40<br>(1.27, 1.54)                     | 1.43<br>(1.28, 1.60)                          | 1.32<br>(1.08, 1.62)                            |
| <b>Urban contrast</b>                            |                                                  |                                          |                                               |                                                 |
| below mean NO <sub>x</sub> 21.2µg/m <sup>3</sup> | 1.00 (ref)                                       | 1.00 (ref)                               | 1.00 (ref)                                    | 1.00 (ref)                                      |
| above mean NO <sub>x</sub> 21.2µg/m <sup>3</sup> | 1.15<br>(0.98, 1.34)                             | 1.27<br>(1.13, 1.44)                     | 1.43<br>(1.28, 1.60)                          | 1.32<br>(0.99, 1.46)                            |
| <b>Non-urban contrast</b>                        |                                                  |                                          |                                               |                                                 |
| below mean NO <sub>x</sub> 8.9µg/m <sup>3</sup>  | 1.00 (ref)                                       | 1.00 (ref)                               | 1.00 (ref)                                    | 1.00 (ref)                                      |
| above mean NO <sub>x</sub> 8.9µg/m <sup>3</sup>  | 1.37<br>(1.18, 1.60)                             | 1.37<br>(1.24, 1.51)                     | 1.43<br>(1.27, 1.60)                          | 1.18<br>(0.95, 1.45)                            |

Gestational diabetes model adjusting for parity, BMI, maternal age, calendar year and country of origin and exposure for second trimester.

Preeclampsia models adjusting for gestational diabetes, type 1 diabetes, smoking, parity, BMI, country of origin, calendar year and maternal age and exposure for third trimester.

**Table S5. ORs and 95% CI for Nordic born women obtained from multivariate logistic regression looking at actual exposure and known risk factors.**

| Potential risk factors                   | Gestational Diabetes<br>N=60520<br>OR (95% CI) | Preeclampsia<br>N=60341<br>OR (95% CI) | Mild preeclampsia<br>N=60341<br>OR (95% CI) | Severe Preeclampsia<br>N=60341<br>OR (95% CI) |
|------------------------------------------|------------------------------------------------|----------------------------------------|---------------------------------------------|-----------------------------------------------|
| <b>Gestational diabetes</b>              | *                                              | 1.90(1.42, 2.55)                       | 1.81(1.31, 2.51)                            | 2.26 (1.28, 4.00)                             |
| <b>Diabetes type 1</b>                   | *                                              | 2.70 (1.76,4.15)                       | 2.56 (1.58, 4.13)                           | 2.61 (1.18, 5.81)                             |
| <b>Maternal Age</b>                      |                                                |                                        |                                             |                                               |
| <25                                      | 0.74 (0.54, 1.02)                              | 1.12 (0.96, 1.31)                      | 1.14 (0.96, 1.35)                           | 0.98 (0.69, 1.39)                             |
| 25-30                                    | 1.00 (ref)                                     | 1.00 (ref)                             | 1.00 (ref)                                  | 1.00 (ref)                                    |
| 30-35                                    | 1.35 (1.11, 1.63)                              | 1.04 (0.93, 1.17)                      | 0.99 (0.87, 1.13)                           | 1.31 (1.02, 1.67)                             |
| ≥35                                      | 2.32 (1.89, 2.84)                              | 1.20 (1.03, 1.39)                      | 1.14 (0.97, 1.34)                           | 1.43 (1.05, 1.95)                             |
| <b>Smoking (cig/day)</b>                 |                                                |                                        |                                             |                                               |
| 0                                        | *                                              | 1.00 (ref)                             | 1.00 (ref)                                  | 1.00 (ref)                                    |
| 1-9                                      | *                                              | 0.65 (0.52, 0.79)                      | 0.67 (0.53, 0.84)                           | 0.57 (0.34, 0.93)                             |
| >10                                      | *                                              | 0.56 (0.40, 0.77)                      | 0.56 (0.39, 0.81)                           | 0.54 (0.26, 1.16)                             |
| <b>Parity</b>                            |                                                |                                        |                                             |                                               |
| 1                                        | 1.07 (0.90, 1.26)                              | 2.67 (2.35, 3.00)                      | 2.62 (2.28, 3.01)                           | 2.68 (2.07, 3.47)                             |
| 2                                        | 1.00 (ref)                                     | 1.00 (ref)                             | 1.00 (ref)                                  | 1.00 (ref)                                    |
| ≥3                                       | 0.96 (0.77, 1.18)                              | 0.86 (0.70, 1.04)                      | 0.91 (0.74, 1.13)                           | 0.66 (0.42, 1.04)                             |
| <b>BMI</b>                               |                                                |                                        |                                             |                                               |
| <18.5                                    | 1.73 (1.04, 2.88)                              | 0.63 (0.39, 1.03)                      | 0.47 (0.25, 0.88)                           | 1.17 (0.55, 2.52)                             |
| 18.5-24.9                                | 1.00 (ref)                                     | 1.00 (ref)                             | 1.00 (ref)                                  | 1.00 (ref)                                    |
| 25-29.9                                  | 1.87 (1.55, 2.25)                              | 1.85 (1.64, 2.09)                      | 1.93 (1.69, 2.21)                           | 1.53 (1.19, 1.98)                             |
| ≥30                                      | 4.05 (3.34, 4.91)                              | 3.75 (3.28, 4.28)                      | 4.07 (3.52, 4.70)                           | 2.28 (1.68, 3.10)                             |
| <b>NO<sub>x</sub> (µg/m<sup>3</sup>)</b> |                                                |                                        |                                             |                                               |
| Q1=2.5-8.9                               | 1.00 (ref)                                     | 1.00 (ref)                             | 1.00 (ref)                                  | 1.00 (ref)                                    |
| Q2=9.0-14.1                              | 1.33 (1.09, 1.63)                              | 1.24 (1.08, 1.41)                      | 1.34 (1.15, 1.55)                           | 0.90 (0.67, 1.20)                             |
| Q3=14.2-22.6                             | 1.57 (1.28, 1.93)                              | 1.33 (1.16, 1.53)                      | 1.43 (1.22, 1.66)                           | 1.04 (0.78, 1.39)                             |
| Q4=>22.7                                 | 1.56 (1.24, 1.95)                              | 1.51 (1.31, 1.74)                      | 1.53 (1.30, 1.80)                           | 1.39 (1.04, 1.85)                             |

Gestational diabetes models adjusting for parity, BMI, maternal age, calendar year and country of origin and exposure for second trimester.

Preeclampsia models adjusting for gestational diabetes, type 1 diabetes, smoking, parity, BMI, country of origin, calendar year and maternal age and exposure for third trimester.

\* not a known risk factor

**Table S6. Odds ratio of preeclampsia in relation to NO<sub>x</sub> (in quartiles and measured in µg/m<sup>3</sup>) and traffic density (measured as vehicles/min)**

| <b>Outcome/exposure</b>                             | <b>Adjusted Non movers OR (95% CI)</b> | <b>Adjusted Nordic born OR (95% CI)</b> | <b>Adjusted Primiparae OR (95% CI)</b> |
|-----------------------------------------------------|----------------------------------------|-----------------------------------------|----------------------------------------|
| <b>Preeclampsia/NO<sub>x</sub> quartiles</b>        |                                        |                                         |                                        |
| Q1=2.5-8.9                                          | 1.00 (ref)                             | 1.00 (ref)                              | 1.00 (ref)                             |
| Q2=9.0-14.1                                         | 1.26 (1.09, 1.44)                      | 1.24 (1.08, 1.41)                       | 1.34 (1.14, 1.58)                      |
| Q3=14.2-22.6                                        | 1.29 (1.12, 1.49)                      | 1.33 (1.16, 1.53)                       | 1.44 (1.22, 1.69)                      |
| Q4=>22.7                                            | 1.48 (1.27, 1.70)                      | 1.51 (1.31, 1.74)                       | 1.61 (1.37, 1.90)                      |
| <b>Preeclampsia mild/NO<sub>x</sub>-quartiles</b>   |                                        |                                         |                                        |
| Q1=2.5-8.9                                          | 1.00 (ref)                             | 1.00 (ref)                              | 1.00 (ref)                             |
| Q2=9.0-14.1                                         | 1.35 (1.15, 1.58)                      | 1.34 (1.16, 1.56)                       | 1.39 (1.16, 1.67)                      |
| Q3=14.2-22.6                                        | 1.39 (1.18, 1.63)                      | 1.42 (1.22, 1.66)                       | 1.53 (1.28, 1.84)                      |
| Q4=>22.7                                            | 1.48 (1.25, 1.75)                      | 1.54 (1.30, 1.81)                       | 1.60 (1.32, 1.93)                      |
| <b>Preeclampsia severe/NO<sub>x</sub>-quartiles</b> |                                        |                                         |                                        |
| Q1=2.5-8.9                                          | 1.00 (ref)                             | 1.00 (ref)                              | 1.00 (ref)                             |
| Q2=9.0-14.1                                         | 0.92 (0.68, 1.25)                      | 0.89 (0.66, 1.20)                       | 1.14 (0.81, 1.63)                      |
| Q3=14.2-22.6                                        | 0.93 (0.68, 1.27)                      | 1.01 (0.75, 1.37)                       | 1.07 (0.75, 1.53)                      |
| Q4=>22.7                                            | 1.41(1.05, 1.89)                       | 1.40(1.04, 1.88)                        | 1.63(1.16, 2.28)                       |
| <b>Preeclampsia/ Traffic Density 200m</b>           |                                        |                                         |                                        |
| <b>no road</b>                                      | 1.00 (ref)                             | 1.00 (ref)                              | 1.00 (ref)                             |
| <2                                                  | 1.08 (0.94, 1.25)                      | 1.12 (0.97, 1.28)                       | 1.27 (1.07, 1.51)                      |
| 2-5                                                 | 1.01 (0.87, 1.16)                      | 1.03 (0.90, 1.19)                       | 1.19 (1.00, 1.41)                      |
| 5-10                                                | 1.13 (0.96, 1.35)                      | 1.20 (1.01, 1.43)                       | 1.29 (1.06, 1.57)                      |
| >10                                                 | 1.01 (0.84, 1.22)                      | 1.12 (0.93, 1.34)                       | 1.32 (1.09, 1.60)                      |
| <b>Preeclampsia mild/Traffic Density 200 m</b>      |                                        |                                         |                                        |
| <b>no road</b>                                      | 1.00 (ref)                             | 1.00 (ref)                              | 1.00 (ref)                             |
| <2                                                  | 1.03 (0.88, 1.20)                      | 1.06 (0.90, 1.23)                       | 1.20 (0.99, 1.46)                      |
| 2-5                                                 | 0.99 (0.84, 1.16)                      | 1.03(0.88, 1.20)                        | 1.15(0.95, 1.39)                       |
| 5-10                                                | 1.14 (0.94, 1.38)                      | 1.20 (0.99, 1.46)                       | 1.31 (1.05, 1.63)                      |
| >10                                                 | 0.96 (0.78, 1.19)                      | 1.05 (0.85, 1.29)                       | 1.27 (1.02, 1.58)                      |
| <b>Preeclampsia severe/Traffic Density 200 m</b>    |                                        |                                         |                                        |
| <b>no road</b>                                      | 1.00 (ref)                             | 1.00 (ref)                              | 1.00 (ref)                             |
| <2                                                  | 1.28 (0.95, 1.72)                      | 1.31 (0.97, 1.77)                       | 1.49 (1.03, 2.14)                      |
| 2-5                                                 | 1.08 (0.79, 1.47)                      | 1.08 (0.78, 1.47)                       | 1.35 (0.94, 1.93)                      |
| 5-10                                                | 1.03 (0.70, 1.53)                      | 1.15 (0.78, 1.69)                       | 1.10 (0.71, 1.72)                      |
| >10                                                 | 1.17 (0.80, 1.73)                      | 1.29 (0.88, 1.89)                       | 1.40 (0.92, 2.12)                      |

Preeclampsia models adjusting for gestational diabetes, type 1 diabetes, smoking, parity, BMI, country of origin, calendar year and maternal age.

**Table S7: Odds ratio for preeclampsia outcome during 1<sup>st</sup> trimester and 2<sup>nd</sup> trimester in relation to NO<sub>x</sub> exposure**

| NO <sub>x</sub> (µg/m <sup>3</sup> ) | Preeclampsia (all) 1 <sup>st</sup> trimester    |             |            |             |
|--------------------------------------|-------------------------------------------------|-------------|------------|-------------|
|                                      | Crude                                           |             | Adjusted*  |             |
|                                      | OR                                              | 95% CI      | OR         | 95% CI      |
| 2.5-8.9                              | 1.00                                            | (Ref)       | 1.00       | (Ref)       |
| 9.0-14.1                             | 1.24                                            | 1.10 – 1.41 | 1.29       | 1.13 – 1.47 |
| 14.2-22.6                            | 1.20                                            | 1.06 – 1.36 | 1.26       | 1.10 – 1.44 |
| >22.7                                | 1.31                                            | 1.15 – 1.48 | 1.43       | 1.25 – 1.63 |
| NO <sub>x</sub> (µg/m <sup>3</sup> ) | Preeclampsia (mild) 1 <sup>st</sup> trimester   |             |            |             |
|                                      | Crude                                           |             | Adjusted*  |             |
|                                      | OR                                              | 95% CI      | OR         | 95% CI      |
| 2.5-8.9                              | 1.00                                            | (Ref)       | 1.00       | (Ref)       |
| 9.0-14.1                             | 1.34                                            | 1.16 – 1.54 | 1.42       | 1.22 – 1.64 |
| 14.2-22.6                            | 1.32                                            | 1.14 – 1.52 | 1.41       | 1.22 – 1.64 |
| >22.7                                | 1.31                                            | 1.14 – 1.52 | 1.47       | 1.26 – 1.71 |
| NO <sub>x</sub> (µg/m <sup>3</sup> ) | Preeclampsia (severe) 1 <sup>st</sup> trimester |             |            |             |
|                                      | Crude                                           |             | Adjusted*  |             |
|                                      | OR                                              | 95% CI      | OR         | 95% CI      |
| 2.5-8.9                              | 1.00                                            | (Ref)       | 1.00 (Ref) | (Ref)       |
| 9.0-14.1                             | 0.98                                            | 0.76 – 1.26 | 0.95       | 0.72 – 1.24 |
| 14.2-22.6                            | 0.95                                            | 0.73 – 1.22 | 0.87       | 0.66 – 1.15 |
| >22.7                                | 1.27                                            | 1.00 – 1.62 | 1.30       | 1.00 – 1.69 |
| NO <sub>x</sub> (µg/m <sup>3</sup> ) | Preeclampsia (all) 2 <sup>nd</sup> trimester    |             |            |             |
|                                      | Crude                                           |             | Adjusted*  |             |
|                                      | OR                                              | 95% CI      | OR         | 95% CI      |
| 2.5-8.9                              | 1.00                                            | (Ref)       | 1.00       | (Ref)       |
| 9.0-14.1                             | 1.24                                            | 1.09 – 1.40 | 1.30       | 1.14 – 1.48 |
| 14.2-22.6                            | 1.22                                            | 1.08 – 1.39 | 1.30       | 1.14 – 1.48 |
| >22.7                                | 1.34                                            | 1.18 – 1.52 | 1.50       | 1.31 – 1.71 |
| NO <sub>x</sub> (µg/m <sup>3</sup> ) | Preeclampsia (mild) 2 <sup>nd</sup> trimester   |             |            |             |
|                                      | Crude                                           |             | Adjusted*  |             |
|                                      | OR                                              | 95% CI      | OR         | 95% CI      |
| 2.5-8.9                              | 1.00                                            | (Ref)       | 1.00       | (Ref)       |
| 9.0-14.1                             | 1.37                                            | 1.19 – 1.58 | 1.46       | 1.26 – 1.69 |
| 14.2-22.6                            | 1.30                                            | 1.12 – 1.50 | 1.41       | 1.21 – 1.64 |
| >22.7                                | 1.38                                            | 1.20 – 1.59 | 1.59       | 1.36 – 1.86 |
| NO <sub>x</sub> (µg/m <sup>3</sup> ) | Preeclampsia (severe) 2 <sup>nd</sup> trimester |             |            |             |
|                                      | Crude                                           |             | Adjusted*  |             |
|                                      | OR                                              | 95% CI      | OR         | 95% CI      |
| 2.5-8.9                              | 1.00                                            | (Ref)       | 1.00       | (Ref)       |
| 9.0-14.1                             | 0.91                                            | 0.70 – 1.17 | 0.87       | 0.66 – 1.15 |
| 14.2-22.6                            | 1.07                                            | 0.84 – 1.37 | 1.02       | 0.78 – 1.33 |
| >22.7                                | 1.23                                            | 0.97 – 1.56 | 1.24       | 0.95 – 1.62 |

\*Model adjusting for gestational diabetes, type 1 diabetes, smoking, parity BMI, country of origin, calendar year and maternal age
